**Table S1. Morphometric data for experimental animals**

| Animal         | Sex | Limb | Body mass (kg) | Humerus length (cm) | Ulna length (cm) | Olecranon length (cm) | Metacarpal III length (cm) | Fossorial ability index | Triceps metacarpal out-force index |
|----------------|-----|------|----------------|---------------------|------------------|-----------------------|----------------------------|-------------------------|------------------------------------|
| <i>Mm</i> 1010 | F   | R    | 4.6            | 7.2                 | 7.5              | 1.2                   | 2.4                        | 0.19                    | 0.14                               |
| <i>Mm</i> 1122 | M   | R    | 3.9            | 7.2                 | 7.7              | 1.7                   | 2.3                        | 0.28                    | 0.21                               |
| <i>Mm</i> 0923 | F   | R    | 4.4            | 7.7                 | 8.4              | 1.6                   | 2.3                        | 0.23                    | 0.17                               |
| <i>Mm</i> 0904 | F   | L    | 5.5            | 7.3                 | 7.9              | 1.6                   | 2.5                        | 0.24                    | 0.18                               |
| <i>Mm</i> 0911 | F   | R    | 6.2            | 7.0                 | 7.1              | 1.7                   | 1.8                        | 0.31                    | 0.23                               |
| <i>Mm</i> 0918 | F   | L    | 4.9            | 6.7                 | 7.2              | 1.3                   | 1.6                        | 0.23                    | 0.18                               |
| <i>Mm</i> 1101 | M   | R    | 4.4            | 6.7                 | 7.7              | 1.5                   | 2.0                        | 0.23                    | 0.18                               |
| <i>Mm</i> 1115 | M   | L    | 3.9            | 6.8                 | 7.3              | 1.4                   | 2.4                        | 0.24                    | 0.17                               |
|                |     |      | <b>4.7±0.8</b> | <b>7.1±0.3</b>      | <b>7.6±0.4</b>   | <b>1.5±0.2</b>        | <b>2.1±0.3</b>             | <b>0.24±0.04</b>        | <b>0.18±0.03</b>                   |

In bold are mean ± s.d.

Indices are defined as in Lagaria and Youlatos (2006). Fossorial ability index (IFA): ratio of olecranon length to total ulna length minus olecranon length; Triceps metacarpal out-force index (TMOI): ratio of olecranon length to the sum of ulna and metacarpal length minus olecranon length.
